# Supplementary material
Source: MDPI journal article supplement (https://www.mdpi.com/2073-4352/14/1/31)
Supplement: s1 [file s1]

# Experimental and theoretical insights into a novel lightfast thiophene azo dye

Rosita Diana <sup>1,\*</sup>, Lucia Sessa <sup>2,\*</sup>, Simona Concilio <sup>2</sup>, Stefano Piotto <sup>2</sup>, Luigi Di Costanzo <sup>1</sup>, Antonio Carella <sup>3</sup>, Barbara Panunzi <sup>1</sup>

<sup>1</sup> Department of Agricultural Sciences, University of Naples Federico II, Via Università 100, 80055 Portici, Italy

<sup>2</sup> Department of Pharmacy, University of Salerno, Via Giovanni Paolo II 132, 84084 Fisciano, Italy

<sup>3</sup> Department of Chemical Sciences, University of Naples Federico II, Strada Comunale Cinthia, 26, 80126 Napoli, Italy

\* Correspondence: R.D. rosita.diana@unina.it and L.S. lucsessa@unisa.it

## Supplementary Materials

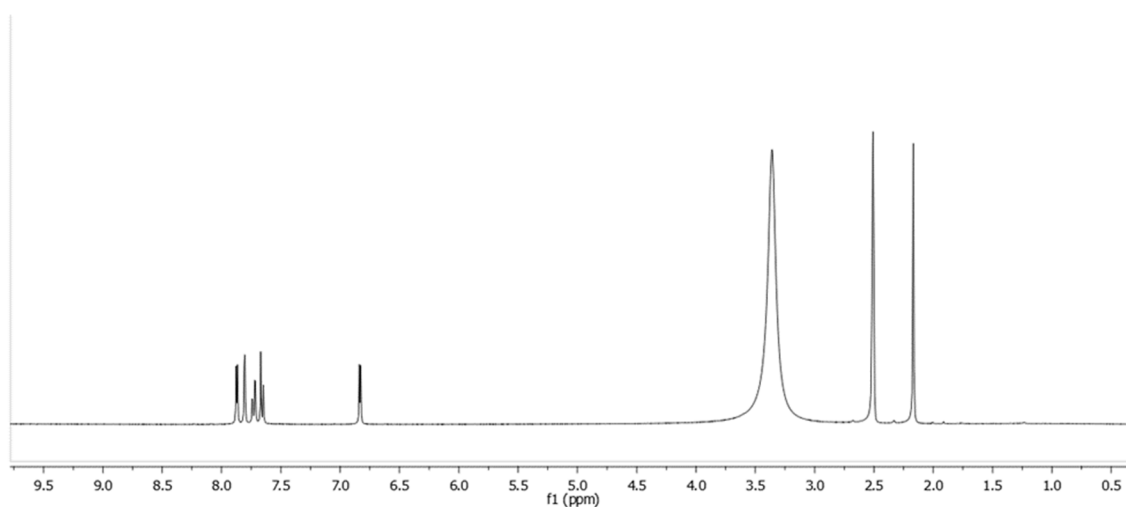

**Figure S1.** <sup>1</sup>H NMR of TA-OH (DMSO-d<sub>6</sub>; 400 MHz)

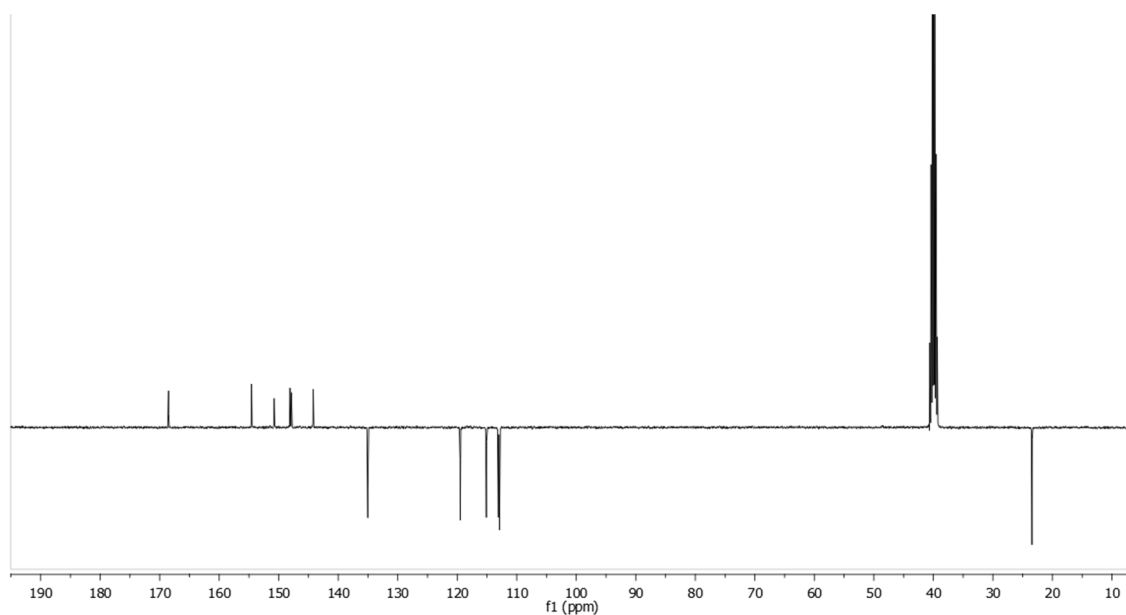

**Figure S2.** <sup>13</sup>C NMR of TA-OH (DMSO-d<sub>6</sub>; 400 MHz). DEPTQ polarization transfer with decoupling during acquisition, shaped pulse for 180-degree pulse on f1 channel.

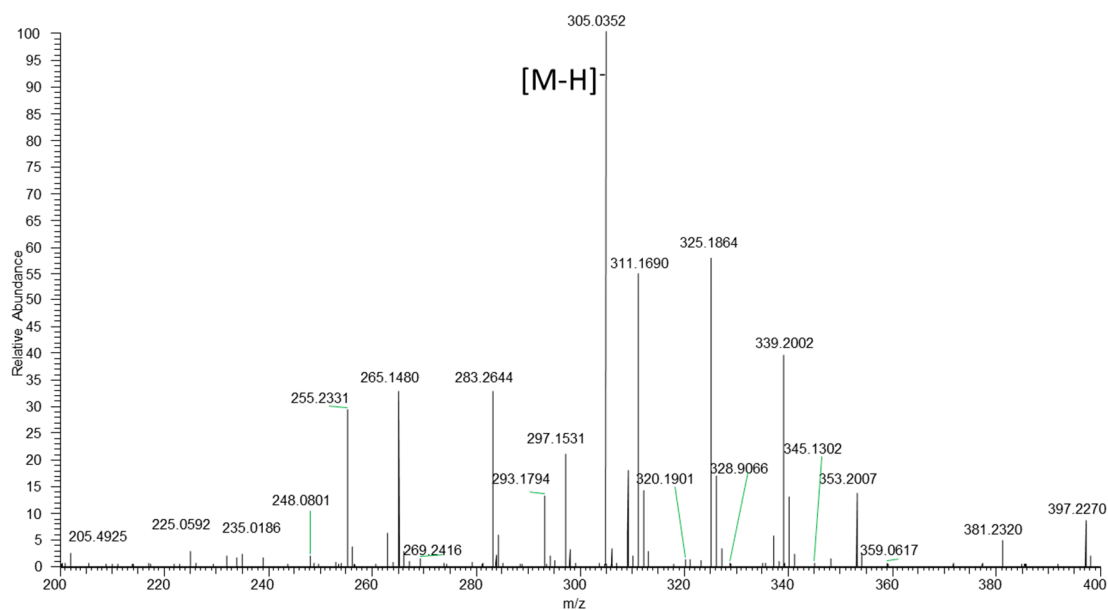

**Figure S3.** Mass spectrum of TA-OH. Formula [M-H]<sup>-</sup> C<sub>12</sub>H<sub>9</sub>O<sub>4</sub>N<sub>4</sub>S. Found m/z: 305.03.

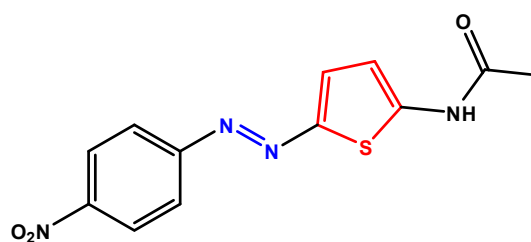

**Figure S4.** Chemical structure of the model molecule TA. The model TA is entirely analogous to TA-OH, but without the hydroxyl group on the phenyl ring.

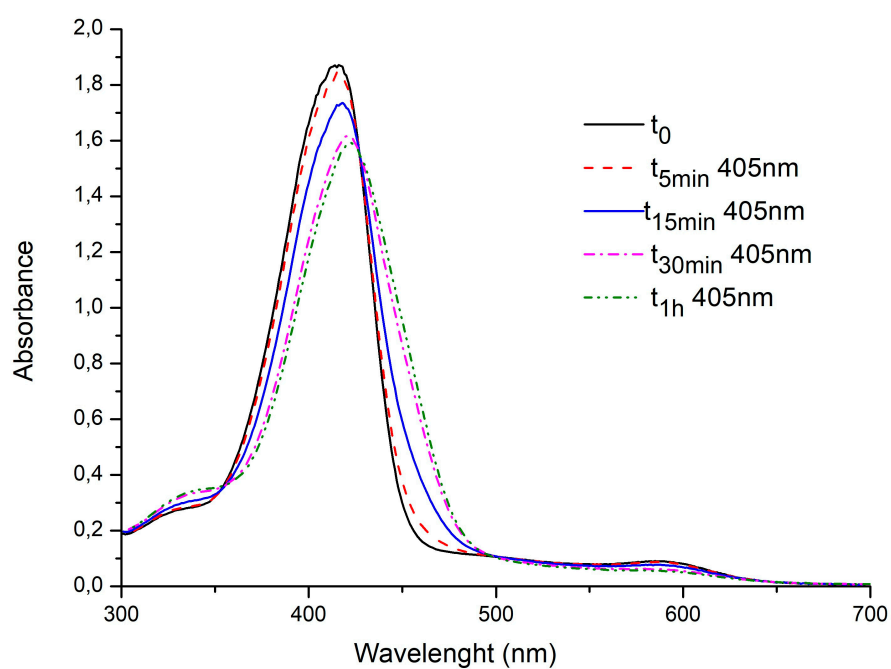

**Figure S5.** UV-Vis photoisomerization of model TA. The experimental UV-vis spectra under excitation at 405 nm show the possibility of photoswitching from the *trans* to the *cis* form.

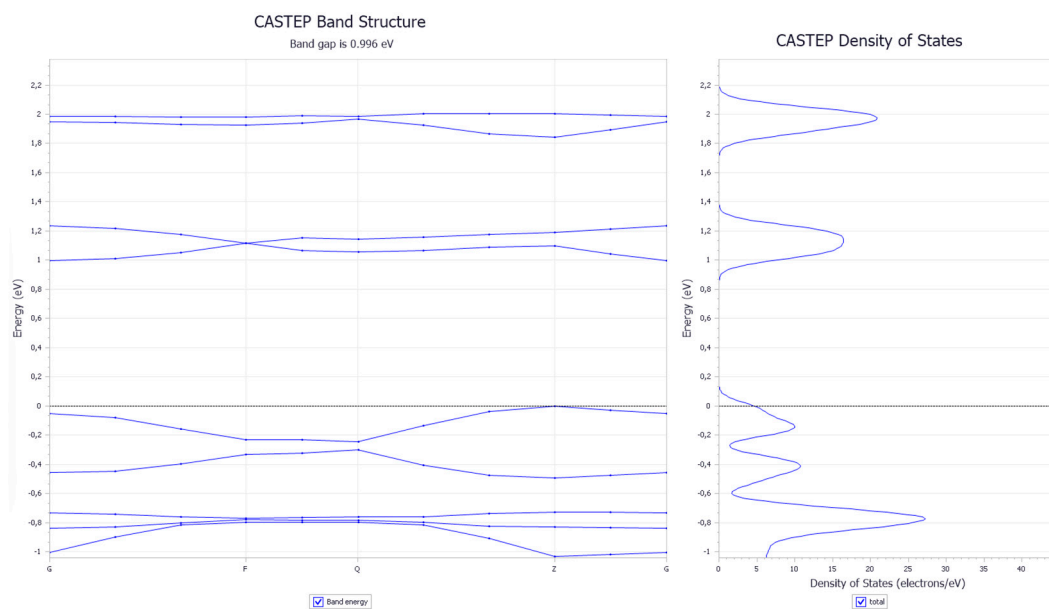

**Figure S6.** Band structure and density of states of the TA-OH crystal.

**Table S1.** Vertical transition energies of protonated TA-OH and deprotonated TA-OH.

| System             | Orbital type | Energy (E <sub>h</sub> ) | Energy (eV) |
|--------------------|--------------|--------------------------|-------------|
| TA-OH protonated   | HOMO-2       | -0.252760                | -6.8779     |
|                    | HOMO-1       | -0.249303                | -6.7839     |
|                    | HOMO         | -0.211623                | -5.7586     |
|                    | LUMO         | -0.113521                | -3.0891     |
|                    | LUMO+1       | -0.074052                | -2.0151     |
|                    | LUMO+2       | -0.017551                | -0.4776     |
|                    | LUMO+3       | -0.015075                | -0.4102     |
| TA-OH deprotonated | HOMO-3       | -0.232040                | -6.3141     |
|                    | HOMO-2       | -0.207225                | -5.6389     |
|                    | HOMO-1       | -0.173592                | -4.7237     |
|                    | HOMO         | -0.168527                | -4.5859     |
|                    | LUMO         | -0.086070                | -2.3421     |
|                    | LUMO+1       | -0.051329                | -1.3967     |
